# Supplementary material for: Pyroptosis of Macrophages Induced by Clostridium perfringens Beta-1 Toxin
Source: MDPI journal article supplement (doi:10.3390/toxins15060366), 2023-05-29
Supplement: s1 [file s1]

## Supplementary Materials:

Table S1: Gene specific primers for qRT-PCR.

| Gene                 | Forward (5'-3')        | Reverse (5'-3')        |
|----------------------|------------------------|------------------------|
| GAPDH (human)        | TGATTTTGGAGGGATCTCGC   | ACGGATTGGTCGTATTGGG    |
| Gasdermin D          | TAGTCCGGAGAGTGGTCCAG   | ACCATGAGCTTGAGGGGCTTC  |
| IL-18 (human)        | TGACCAAGGAAATCGGCCTC   | ATGGTCCGGGGTGCATTATC   |
| Caspase 1 (human)    | AATTTTCCGCAAGGTTTCGATT | ACTCTTTCAGTGGTGGG      |
| NLRP3 (human)        | AAAGAGATGAGCCGAAGTGG   | TGCACTGGAATCTGCTTCTC   |
| IL-1 $\beta$ (human) | ATGATGGCTTATTACAGTGGC  | GTCGGAGATTTCGTAGCTGGA  |
| GAPDH (mouse)        | GGAGAGTGTTCCTCGTCCC    | ACTGTGCCGTTGAATTTGCC   |
| Gasdermin D (mouse)  | GGAGGAATTAATTGAGGCGGC  | GGCACCAGTTCTCCAGAGTC   |
| IL-18 (mouse)        | GGCCGACTTCACTGTACAACC  | TCTGGGGTTCACTGGCACTTTG |
| Caspase 1 (mouse)    | ACACGTCTTGCCCTCATTATCT | ATAACCTTGGGCTTGTCTTTCA |
| NLRP3 (mouse)        | GCTGCGATCAACAGGCGAGA   | AAGGCTGTCCTCCTGGCATAAC |
| IL-1 $\beta$ (mouse) | ATAACCTGCTGGTGTGTGAC   | TCCTGACCACTGTTGTTTCCC  |

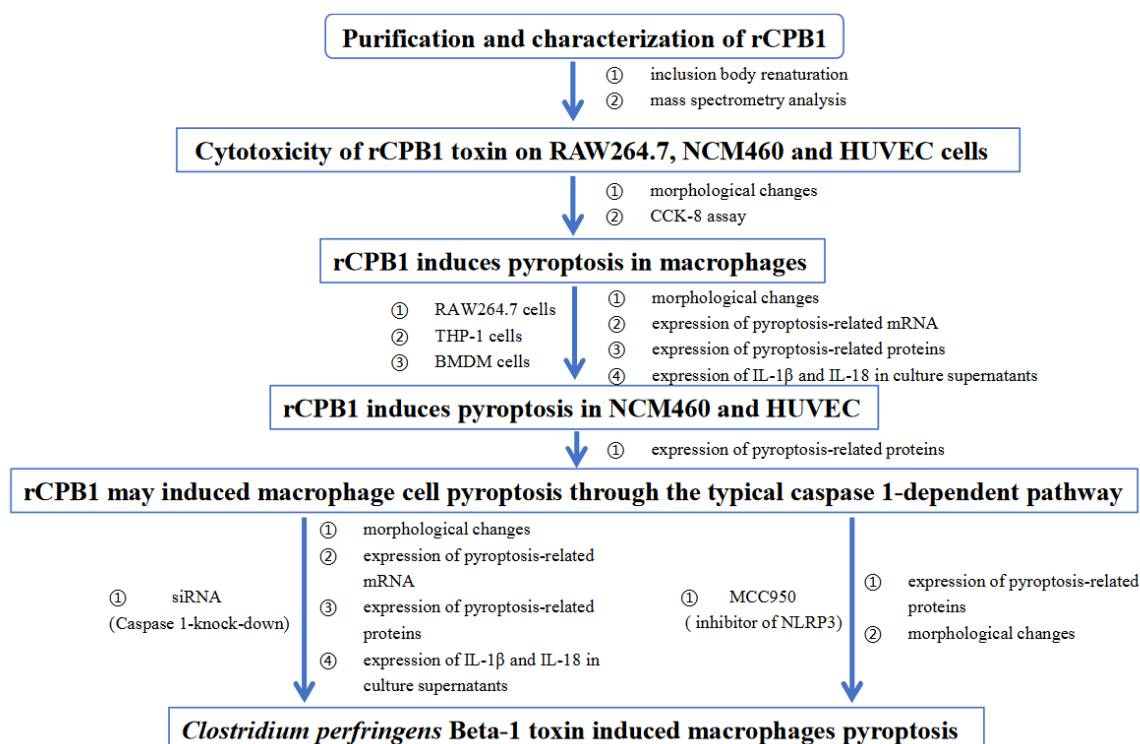

Figure S1: A schematic diagram to summarize our new findings.
